# Supplementary material
Source: publisher figshare collection journal article supplement (https://frontiersin.figshare.com/ndownloader/files/26725061)

# Value of Adaptive Trials and Surrogate Endpoints for Clinical Decision-Making in Rare Cancers

Andriy Krendyukov, MD,\*<sup>1</sup> Sanjay Singhvi, MD,<sup>2</sup> Markus Zabransky, MD<sup>3</sup>

**Supplementary Figure 1A and Figure 1B**

**Supplementary Figure 1A.** Level of importance of evidence attributed to time-to-first-subsequent treatment (TFST), time-to-second progression (PFS2), and time-to-second-subsequent treatment (TSST) as appropriate alternatives in the absence of progression-free-survival (PFS) or overall survival (OS) data when making clinical decisions for an innovative medicinal product in rare cancers. Survey question: Please select the level of importance attributed to each surrogate endpoint when evaluating clinical evidence for an innovative medicinal product in rare cancer (N=231).

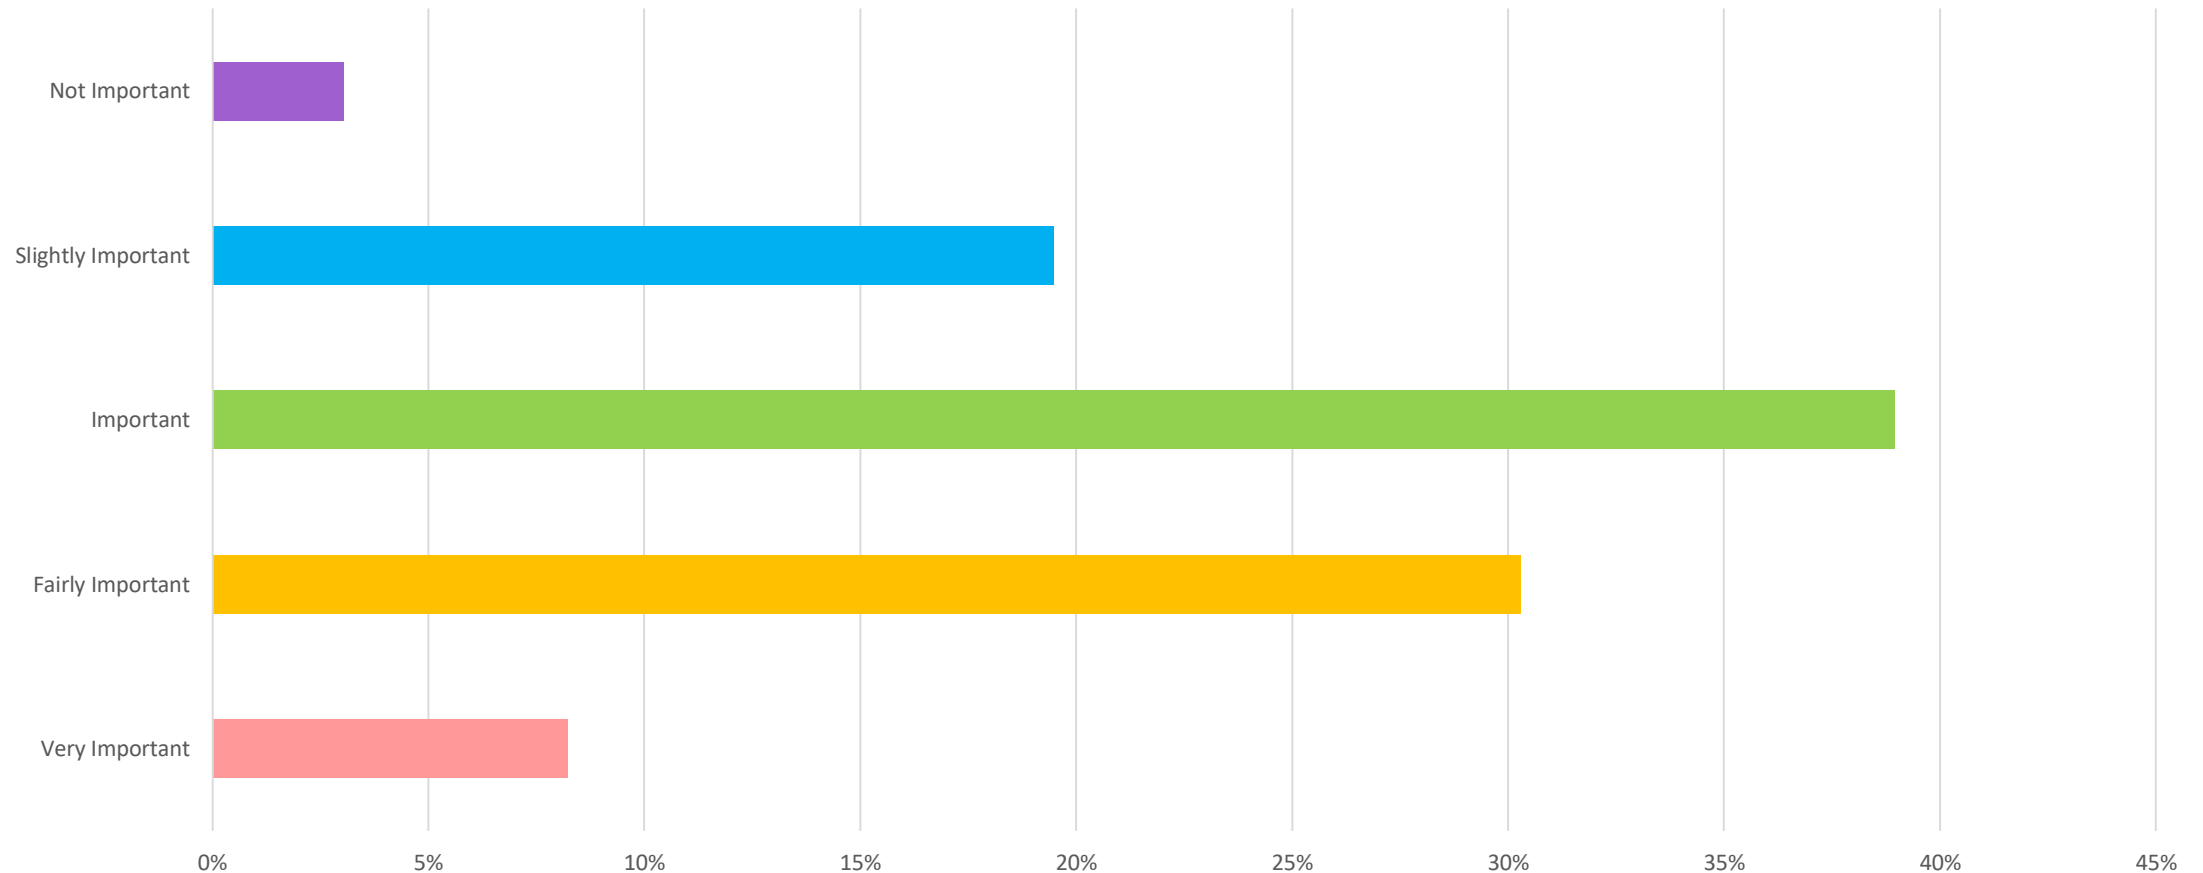

**Supplementary Figure 1B.** Level of importance of evidence attributed to progression-free-survival (PFS) as an appropriate alternative for clinical decision making for innovative medicinal products in rare cancers in the absence of overall survival (OS) data (N=231).

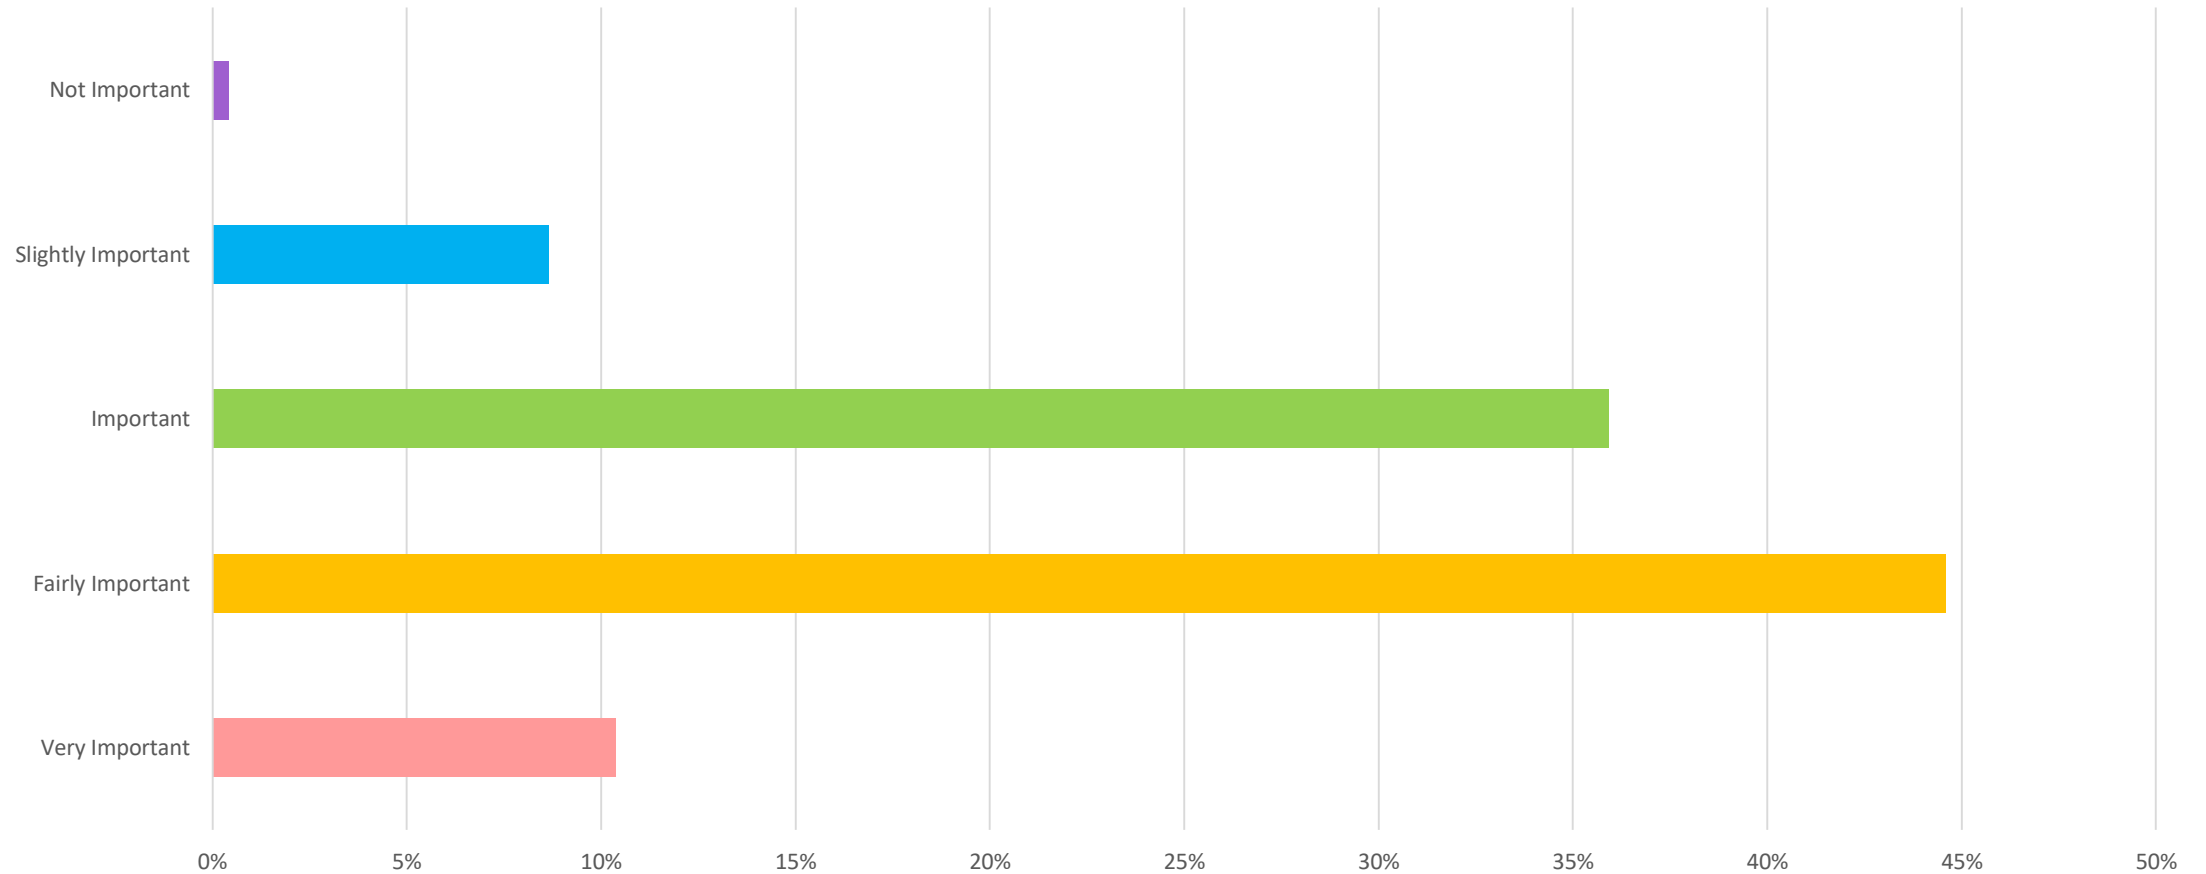

Supplement: Supplementary file [file 26725061]
